# Supplementary material for: Clinical PathoScope: rapid alignment and filtration for accurate pathogen identification in clinical samples using unassembled sequencing data
Source: PubMed Central journal article supplement (PMC4131054; doi:10.1186/1471-2105-15-262), 2014-08-04

**a. Sample F1 (SRR950015); *Acinetobacter baumannii* and *Pseudomonas aeruginosa***

*Acinetobacter baumannii*

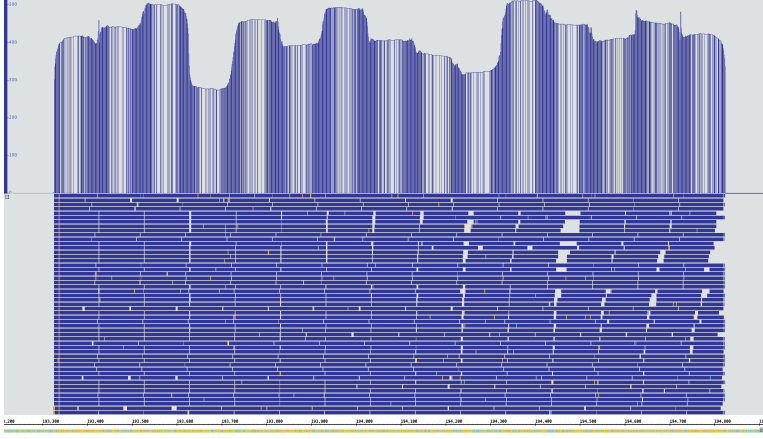

*Acinetobacter* sp. ADP1 (nearest neighbor)

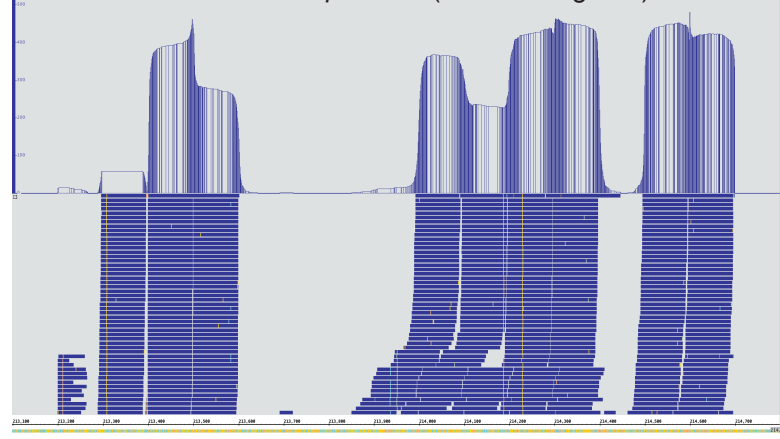

*Pseudomonas aeruginosa*

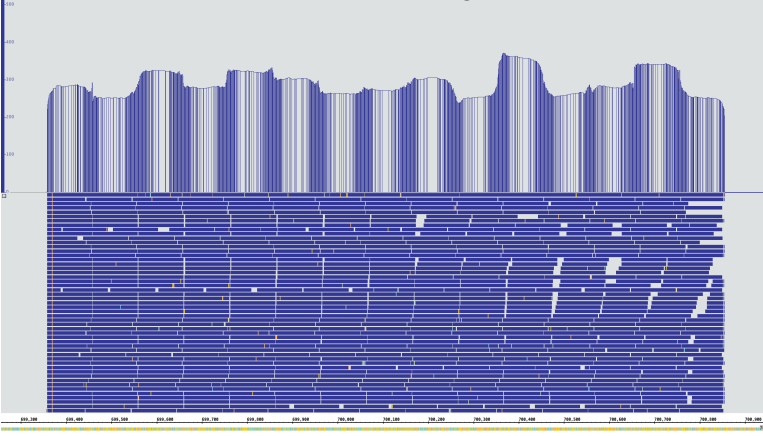

*Pseudomonas mendocina* (nearest neighbor)

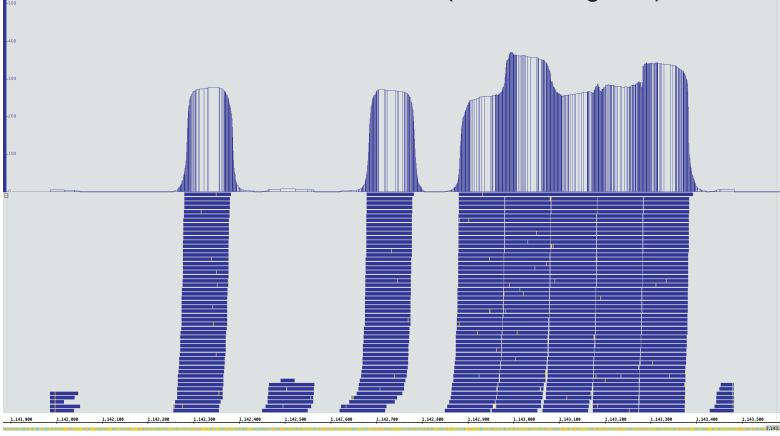

**b. Sample G1 (SRR950024); *Pseudomonas aeruginosa***

*Pseudomonas aeruginosa*

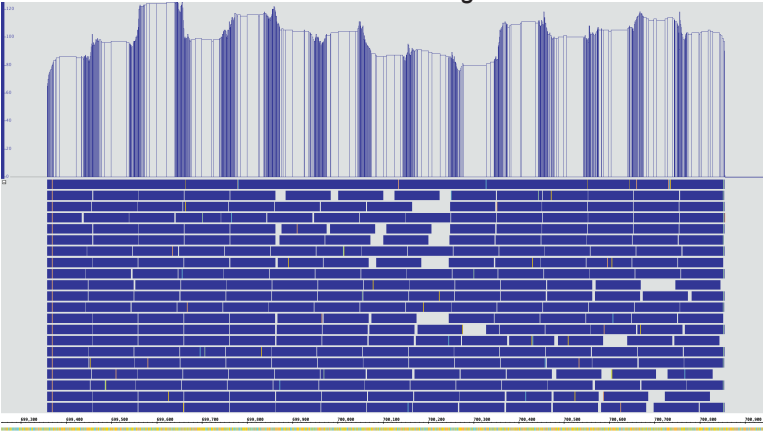

*Pseudomonas mendocina* (nearest neighbor)

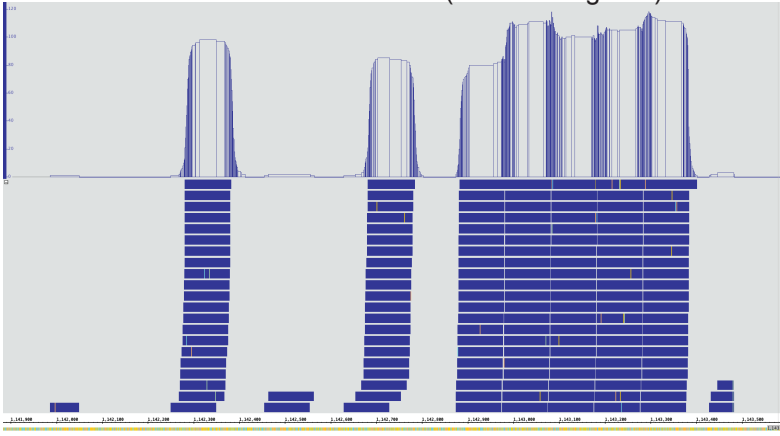

**c. Sample H1 (SRR950025); *Enterobacter aerogenes***

*Enterobacter aerogenes*

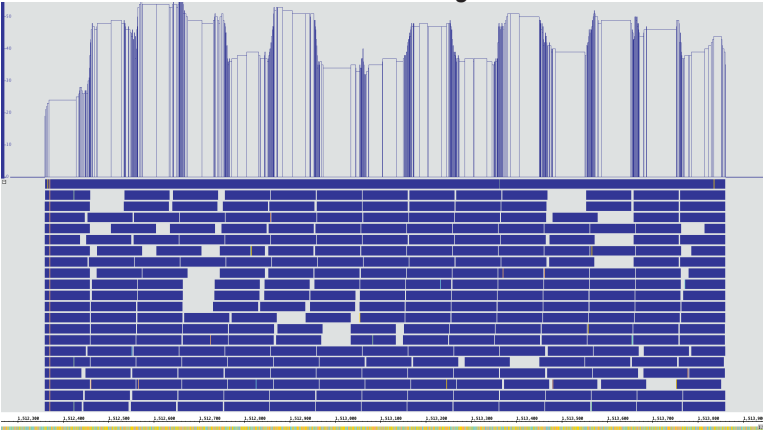

*Enterobacter cloacae* (nearest neighbor)

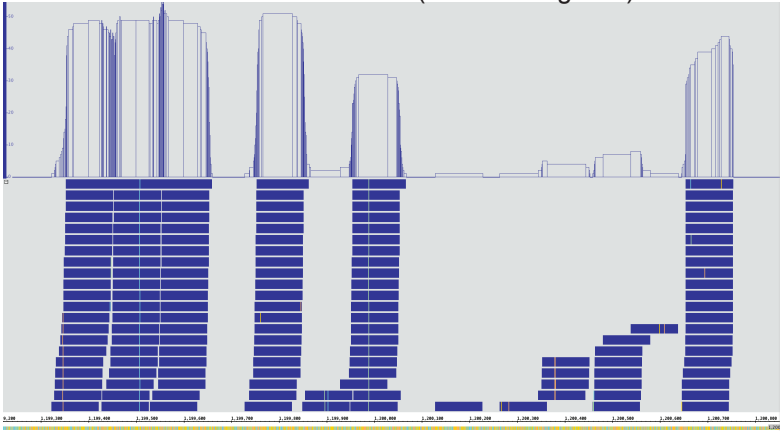

Supplement: 12859_2013_6527_MOESM11_ESM.pdf [file 12859_2013_6527_MOESM11_ESM.pdf]
